1

2

3

4 **Preservation of three-dimensional spatial structure in the gut**  
 5 **microbiome**

6

7

8

9 Yuko Hasegawa<sup>1,#a</sup>, Jessica L. Mark Welch<sup>1\*</sup>, Blair J. Rossetti<sup>1,2,#b</sup>, and Gary G. Borisy<sup>2</sup>

10

11 <sup>1</sup>Marine Biological Laboratory, Woods Hole, Massachusetts, United States of America

12

13 <sup>2</sup>The Forsyth Institute, Cambridge, Massachusetts, United States of America

14

15 <sup>#a</sup>Current address: Okinawa Institute of Science and Technology, Okinawa, Japan

16

17 <sup>#b</sup>Current address: Emory University, Atlanta, GA

18

19

20

21 \* Corresponding author. Email: [jmarkwelch@mbi.edu](mailto:jmarkwelch@mbi.edu)

22

23

## 24     **Abstract**

25     Preservation of three-dimensional structure in the gut is necessary in order to analyze  
 26     the spatial organization of the gut microbiota and gut luminal contents. In this study, we  
 27     evaluated preparation methods for mouse gut with the goal of preserving micron-scale  
 28     spatial structure while performing fluorescence imaging assays. Our evaluation of  
 29     embedding methods showed that commonly used media such as Tissue-Tek Optimal  
 30     Cutting Temperature (OCT) compound, paraffin, and polyester waxes resulted in  
 31     redistribution of luminal contents. By contrast, a hydrophilic methacrylate resin,  
 32     Technovit H8100, preserved three-dimensional organization. Our mouse intestinal  
 33     preparation protocol optimized using the Technovit H8100 embedding method was  
 34     compatible with microbial fluorescence *in situ* hybridization (FISH) and other labeling  
 35     techniques, including immunostaining and staining with both wheat germ agglutinin  
 36     (WGA) and 4',6-diamidino-2-phenylindole (DAPI). Mucus labeling patterns of the  
 37     samples fixed with paraformaldehyde (PFA) and Carnoy's fixative were comparable.  
 38     The protocol optimized in this study enabled simultaneous visualization of micron-scale  
 39     spatial patterns formed by microbial cells in the mouse intestines along with  
 40     biogeographical landmarks such as host-derived mucus and food particles.

41

## 42     **Introduction**

43     Preservation of spatial structure in intestinal samples is crucial for investigating spatial  
 44     organization of the gut microbiota relative to mucins, host tissue, and food particles. Yet  
 45     selecting a protocol for intestinal sample preparation is made difficult by conflicting  
 46     recommendations in the literature. Several authors report that fixation in aqueous  
 47     fixatives such as formaldehyde allows dissolution or dispersal of the mucus layer and  
 48     suggest that fixation in the non-aqueous Carnoy or methacarn solution is essential for

49 mucus preservation (Swidsinski 2005, Johansson & Hansson 2012, Earle et al. 2015).  
 50 Thus, a widely used protocol is to process gut samples by Carnoy fixation followed by  
 51 paraffin embedding and sectioning. Other authors, however, report that the use of  
 52 organic solvents during the paraffin clearing step results in extraction of portions of the  
 53 mucus layer and instead recommend freezing in Optimal Cutting Temperature (OCT)  
 54 compound and cryosectioning followed by fixation in formalin for optimal preservation of  
 55 mucus (Cohen et al. 2012). An alternative method, embedment in acrylic resin, has long  
 56 been used for electron microscopy and is increasingly being applied to samples to be  
 57 examined using light microscopy and fluorescence *in situ* hybridization (FISH) (Moter et  
 58 al. 1998, Moter & Göbel 2000, De Jonge et al. 2005, Heimesaat et al. 2006, Zijng et al.  
 59 2010, Schimak et al. 2016). However, in no case has a thorough investigation been  
 60 carried out to determine if the protocols adequately preserve the three-dimensional  
 61 organization of the gut luminal contents.

62  
 63 In this study, we compared protocols for preparation of intestinal sections with the goal  
 64 of preserving the micron-scale spatial arrangement of microbial cells and other luminal  
 65 contents, including food particles and host-derived mucus. We compared preservation  
 66 of three-dimensional structure using confocal microscopy of four different embedding  
 67 media: OCT compound; paraffin wax; polyester wax; and glycol methacrylate resin. We  
 68 then evaluated applicability of microbial FISH and two mucus labeling methods to  
 69 simultaneously visualize microbial cells and host-derived mucus in intestinal sections  
 70 following both Carnoy and paraformaldehyde (PFA) fixation.

71

72

73

## 74 **Materials and methods**

### 75 **Mouse intestinal samples**

76 Segments of colon were collected from nu/nu mice (courtesy of Dr. Shanta M. Messerli,  
77 Marine Biological Laboratory) euthanized for unrelated experiments. Protocols for animal  
78 care, handling, and “tissue sharing” were approved by the Institutional Animal Care and  
79 Use Committee of the Marine Biological Laboratory. Additional samples from gnotobiotic  
80 C57BL/6J mice were provided by Dr. Nathan McNulty and Dr. Jeffrey I. Gordon,  
81 Washington University in St. Louis. Intestinal samples were cut into 5- to 10-mm long  
82 pieces using a razor blade and subsequently processed by one of the following methods.

83

### 84 **Methacrylate embedding with Carnoy fixation**

85 Samples were placed directly into ice-cold Carnoy solution (60% ethanol, 30%  
86 chloroform, 10% glacial acetic acid) for 2 hours, then rinsed with several changes of  
87 100% ethanol and stored in 100% ethanol at -20°C until embedding. For embedding in  
88 Technovit H8100 methacrylate resin, the ethanol was removed and samples were  
89 infiltrated with several changes of Technovit H8100 infiltration solution prepared as  
90 directed by the manufacturer under vacuum at 4°C with gentle agitation, with the last  
91 infiltration step proceeding overnight. Samples were then transferred into BEEM  
92 capsules filled with embedding solution prepared as directed by the manufacturer and  
93 allowed to harden at 4°C overnight.

94

### 95 **Methacrylate embedding with PFA fixation**

96 Samples were gently coated with molten 0.5% low melting point agarose, placed at 4°C  
97 to allow the agarose to harden, then fixed in 2% PFA in phosphate-buffered saline (PBS)  
98 for 12 hours at 4°C. Samples were briefly washed with 1X PBS and deionized water,



99 then were again coated in molten 0.5% agarose and placed at 4°C to allow the agarose  
 100 to harden. Excess agarose was trimmed before Technovit H8100 embedding. Samples  
 101 were dehydrated in acetone for 1 hour at 4 °C and were then placed in infiltration  
 102 solution prepared as directed by the manufacturer with several changes of infiltration  
 103 solution for a total of 12 hours. Samples were then transferred into Eppendorf tubes filled  
 104 with embedding solution prepared as directed by the manufacturer and allowed to  
 105 harden for 12 hours at 4 °C.

106

### 107 **Sectioning of methacrylate blocks**

108 Methacrylate-embedded intestines were sectioned to 5 µm thickness using a microtome  
 109 (Sorvall JB-4, Dupont Instrument). Sections were cut with glass knives or tungsten  
 110 carbide triangle knives and were sectioned dry and transferred onto a drop of water on a  
 111 slide. Sections were dried on a warm plate and then subjected to fluorescent labeling  
 112 experiments.

113

### 114 **Paraffin embedding with Carnoy fixation**

115 Samples were immersed in ice-cold Carnoy solution for 2 hours, then rinsed in several  
 116 changes of 100% ethanol and stored in 100% ethanol at -20°C until embedding. For  
 117 embedding, samples were immersed in 3 changes of xylene for one hour each, then  
 118 immersed in 3 changes of molten paraffin wax (Paraplast, Electron Microscopy  
 119 Sciences) at 56-58°C for one hour each. Blocks were allowed to harden at room  
 120 temperature. Sections were cut to 15 µm thickness and were floated on a water bath at  
 121 40-45°C, then transferred to slides, dried, and stored at room temperature. In  
 122 preparation for staining, slides were deparaffinized by heating at 60°C for 10 minutes  
 123 followed by immersion in 4 changes of xylene for 2.5 minutes each, then in 2 changes of

124 100% ethanol for 3 minutes each, then rehydrated through 95% and 75% ethanol for 1  
125 minute each and immersed in 900 mM NaCl, 20 mM Tris pH 7.5 in preparation for FISH.  
126

### 127 **Polyester embedding with Carnoy fixation:**

128 Samples were immersed in ice-cold Carnoy solution for 2 hours, then rinsed in several  
129 changes of 100% ethanol and stored in 100% ethanol at -20°C until embedding. For  
130 embedding, samples were immersed in a 1:1 mixture of molten polyester wax  
131 (polyethylene glycol distearate PEG-400 DS, HallStar Company, Stow, OH) and ethanol  
132 at 45°C for 30 minutes, then in 3 changes of 100% molten polyester wax at 45°C for 1  
133 hour each. Blocks were allowed to harden at room temperature. Sections were cut to  
134 15 µm thickness and were transferred to a subbed slide, stretched using a drop of 2%  
135 PFA, dried, and stored at room temperature. In preparation for staining, slides were  
136 incubated in 2 changes of 100% ethanol for 5 minutes each, then in 95% and 75%  
137 ethanol for 5 minutes each, then immersed in 900 mM NaCl, 20 mM Tris pH 7.5 in  
138 preparation for FISH.

139

### 140 **Cryosectioning**

141 Intestinal samples were immersed in OCT compound (Tissue-Tek, Sakura Finetek USA,  
142 Inc. Torrance, CA), snap-frozen in liquid nitrogen and stored at -80 °C until sectioning.  
143 Frozen samples were sectioned to 12.5 µm thickness at -25 °C using a cryostat (Microm  
144 HM 505N) and then placed on Superfrost Plus microscope slides (Cat # 4951PLUS-001,  
145 Erie Scientific Company, Portsmouth, NH). To prevent the loss of intestinal contents as  
146 well as sections themselves during fixation and labeling, sections were coated with  
147 agarose by touching the surface of the slide to molten 0.5% low melting point agarose  
148 (IB70051, IBI Scientific, Peosta, IA). Sections were then fixed in 2% PFA in 1x PBS for

149 12 hours at 4°C, then briefly washed with 1 X PBS and distilled water to remove PFA.

150 Slides were then dipped for 3 minutes each into 50%, 80%, and 96% (v/v) ethanol to

151 dehydrate the intestinal sections.

152

## 153 **FISH**

154 FISH targeting bacterial cells was performed using the oligonucleotide probe Eub338

155 (Amann et al. 1990) custom synthesized and 5' labeled with Rhodamine Red X (Thermo-

156 Fisher Inc., Waltham, MA). Sections were incubated in a hybridization buffer of 0.9 M

157 NaCl, 0.02 M Tris pH 7.5, 0.01% SDS, 20% HiDi formamide (Applied Biosystems) and 2

158 µM probe at 46°C for six hours. After hybridization, samples were washed at 48°C for 15

159 minutes in a large excess of wash buffer (0.215 M NaCl, 0.02 M Tris pH 7.5, 0.005 M

160 EDTA). Additional FISH on sections of gnotobiotic colon was carried out in the same

161 way except using three oligonucleotide probes: Eub338 5' labeled with Alexa Fluor 647,

162 Bthe577 specific for *Bacteroides thetaiotaomicron* (Mark Welch et al., submitted) 5'

163 labeled with Rhodamine Red X and Erec1259 specific for *Eubacterium rectale* (Mark

164 Welch et al., submitted) 5' labeled with Alexa Fluor 594.

165

## 166 **Immunostaining**

167 Sections on microscope slides were treated with a blocking solution (2% goat serum; 1%

168 bovine serum albumin; 0.2% Triton X-100; 0.05% Tween 20) for 1 hour at room

169 temperature. Sections were then incubated with 1:50 dilution of an anti-mouse colonic

170 mucin primary antibody (anti-MCM, a gift of Dr. Ingrid B. Renes, Erasmus MC-Josephine

171 Nefkens Institute) diluted in the blocking solution for 12 hours at 4 °C. After incubation,

172 intestinal sections were rinsed for 3 minutes each in fresh 1X PBS, treated with blocking

173 solution for 1 hour at room temperature, and then incubated with a 1:1000 dilution of the

174 Alexa Fluor 633 goat anti-rabbit IgG (Cat# A21070, Invitrogen, Carlsbad, CA) in blocking  
175 solution and rinsed for 3 minutes each in fresh 1X PBS.

176

## 177 **Fluorescent staining with DAPI and WGA**

178 Sections were stained with 1 µg/ml 4',6-diamidino-2-phenylindole (DAPI) and 20 or 40  
179 µg/ml wheat germ agglutinin (WGA) Alexa Fluor 680 conjugate (Invitrogen Inc., Carlsbad,  
180 CA) in 1X PBS for 15 minutes at room temperature, then incubated 2 x 3 minutes in  
181 wash buffer (215 mM NaCl, 20 mM Tris pH 7.5, 5 mM EDTA). Slides were then dipped  
182 in water, drained, and air-dried, or were dipped for 3 minutes each into 50%, 80%, and  
183 96% (v/v) ethanol and then air-dried. Slides were mounted with ProLong Gold antifade  
184 reagent (Cat # P36934, Invitrogen Inc., Carlsbad, CA) and placed in a dark environment  
185 at room temperature for at least 24 hours until the mounting medium solidified. Images  
186 were acquired with a Zeiss LSM 510, 710 or 780 confocal microscope or a widefield  
187 microscope, the Axio Imager.Z2 (Carl Zeiss, Thornwood, NY). When microbial cells and  
188 mucus were visualized on the same Technovit H8100-embedded intestinal sections,  
189 FISH was performed prior to mucus staining.

190

## 191 **Results**

### 192 **Retention of luminal contents**

193 Following standard procedures, we first attempted to immobilize, retain and visualize  
194 luminal contents by a cryo-freezing and cryosectioning procedure. We immersed pieces  
195 of freshly dissected intestine in OCT compound, snap-froze them in liquid nitrogen and  
196 stored them at -80°C until cryosectioning at -25°C. However, in initial experiments, we  
197 found that a large fraction of the luminal contents, including both food particles and  
198 bacteria, were apparently missing or lost from the sample sections (Fig 1 top row).

199 Partial or complete loss occurred irrespective of whether the OCT-embedded  
200 cryosections were fixed with PFA or Carnoy's fixative or with both. Since most of the  
201 luminal contents are normally in physiological transit through the gut, they are  
202 intrinsically not adherent to the gut wall. We inferred that the luminal contents could have  
203 been physically lost from the sections even though the material had been subject to  
204 fixation. Loss could have occurred prior to chemical fixation, during the fixation process  
205 itself, washing steps or during the subsequent staining.

206 Since sample cryosections are normally warmed to 4°C for post-sectioning fixation, cryo-  
207 immobilization would have been lost during the warming. Consequently, we explored the  
208 use of a hydrogel to provide immobilization before subjecting the cryosections to any  
209 further procedures. Nascent sections were exposed to a thin layer of low melting point  
210 agarose immediately after cryosectioning. After gelling, the sections were then fixed and  
211 processed. This simple agarose embedding step retained luminal contents and showed  
212 little or no sign of loss of material (Fig 1 bottom row).

213

214 For preparation of colon samples for imaging, we explored four sectioning procedures:  
215 cryosectioning with post-sectioning fixation, and structure preservation by chemical  
216 fixation prior to embedment and sectioning, for which we explored three different  
217 embedment materials—paraffin wax, polyester wax, and glycol methacrylate plastic  
218 (Technovit H8100). Either freshly dissected intestinal segments or segments previously  
219 snap-frozen were fixed at 4°C prior to embedment and sectioning at room temperature.  
220 In this procedure, two agarose hydrogel steps were incorporated into the protocol. First,  
221 molten agarose was applied to the ends of the intestinal segments and allowed to  
222 harden to prevent loss of material from the ends. Then, the tissue segments were fixed  
223 (in either PFA or Carnoy's fixative) after which they were immersed in molten agarose

224 and allowed to harden in preparation for cutting into smaller pieces for embedment. By  
225 these methods (Fig 2), luminal contents, including both food and bacteria, were retained  
226 and could be readily visualized in conventional sections stained with DAPI or prepared  
227 for fluorescence *in situ* hybridization.

228

## 229 **Evaluation of 3D preservation**

230 Having established several procedures for retaining and visualizing intestinal luminal  
231 contents, the next issue to be investigated was the degree to which the three-  
232 dimensional distribution of material was preserved. To evaluate this question, confocal z-  
233 stack images were acquired for each of the preparative procedures. Although  
234 conventional two-dimensional images acquired in the xy-plane showed apparently  
235 similar features for each of the procedures (Fig 3), analysis in the z-direction revealed  
236 important differences. As demonstrated by profile images in the xz- or yz-planes (Fig 4),  
237 only for embedment in Technovit H8100 were the luminal contents evenly distributed  
238 throughout the depth of the section. For cryofrozen, cryosectioned, and post-fixed  
239 samples and for prefixed paraffin or polyester embedded samples, luminal contents  
240 were not evenly distributed through the section. Analysis of the xz- and yz-planes  
241 showed that much of the luminal material was at the bottom of the section, the surface  
242 adjacent to the microscope slide. This uneven and bottom-heavy distribution suggests  
243 that luminal contents became redistributed by collapsing onto the slide during  
244 preparation, or that the adhesive surface of the slide retained only the material  
245 immediately adjacent to it, while material not adjacent to the slide was not bound and  
246 was lost.

247 The differences in results from different embedment materials can be understood in  
248 terms of their hydrophobic versus hydrophilic character. Both paraffin and polyester

249   embedments, being hydrophobic, require organic solvents to remove the embedding  
 250   wax after sectioning before staining or probe hybridization. Redistribution, collapse, or  
 251   loss of luminal contents could have occurred after removal of the embedding wax, during  
 252   passage from the organic solvent to the aqueous solution needed for hybridization or  
 253   during subsequent washing steps. In contrast, Technovit H8100 is a covalently cross-  
 254   linked methacrylate resin. It is hydrophilic and allows probe hybridization after sectioning  
 255   without removal of the embedding resin. In the case of cryosectioning, the OCT  
 256   compound only works to immobilize contents while at low temperature. After  
 257   cryosectioning, the necessity to warm the section before exposing it to an aqueous  
 258   solution or to a fixative essentially negated the OCT immobilization. These treatments  
 259   removed the OCT compound by dilution and had to be carried out at elevated  
 260   temperature (0-4°C), conditions under which redistribution and collapse could occur. In  
 261   summary, of the embedments examined, only Technovit H8100 enabled both retention  
 262   and visualization of the three-dimensional distribution of bacteria and food particles in  
 263   the intestinal lumen.

264   Technovit H8100 also proved to be a very stable embedment. Blocks or sections could  
 265   be stored for long periods (at least 2 years) and probed at a later time, producing results  
 266   indistinguishable from those obtained by probing immediately after sectioning. Also,  
 267   probed sections were stable and could be imaged at a later date without noticeable  
 268   differences except those caused by photobleaching during the initial image acquisition.  
 269   Consequently, all further experiments were carried out on Technovit H8100 embedded  
 270   and sectioned material.

## 271   **Comparison of fixation methods for preservation and visualization of** 272   **mucus**

273 Host-derived mucins play an important role in determining the composition and  
 274 biogeography of microbes in the gut. Hence, it is important to be able to visualize mucus  
 275 as well as to probe for microbes. Historically, Carnoy's fixative has been used for the  
 276 fixation of intestinal samples to preserve mucus produced by the host tissues  
 277 (Johansson et al. 2008, Hansson & Johansson 2010). However, the fixative commonly  
 278 used in the established microbial FISH protocol (Moter & Göbel 2000; Amann & Fuchs  
 279 2008) is PFA. Consequently, we evaluated preservation of overall mucus structure by  
 280 fixation with PFA compared with Carnoy's fixative. Freshly dissected or previously frozen  
 281 intestinal samples were fixed in parallel either with Carnoy's fixative or in PFA,  
 282 embedded in Technovit H8100, sectioned, probed in parallel and imaged. Mucus was  
 283 visualized with a fluorescent WGA which binds to sialic acid residues known to be  
 284 abundant in colonic mucin (Rhodes 1989, Matsuo et al. 1997) and by indirect  
 285 immunofluorescence using an anti-MCM as the primary antibody. The results (Figs 5  
 286 and 6) showed that both fixation procedures were effective in preserving and allowing  
 287 the visualization of intestinal mucus. Mucus in the lumen, lining the epithelial boundary  
 288 and in goblet cells all could be visualized. No significant differences were detected  
 289 between Carnoy's fixative and PFA fixation. Mucus staining patterns observed in these  
 290 experiments were similar to those described in studies that used Carnoy's fixative to  
 291 preserve mucus in intestinal sections (Johansson et al. 2008, Hansson & Johansson  
 292 2010, Johansson et al. 2011). These results indicate that mucus components stainable  
 293 with WGA and anti-MCM antibody were preserved in intestinal sections fixed with PFA.

294

295 **FISH probe reactivity in methacrylate sections with both Carnoy and PFA**  
 296 **fixation**



297 FISH is a labeling technique adapted to visualize microbial cells and is the method of  
 298 choice for studies of microbial spatial structure (Amann & Fuchs, 2008). Importantly, the  
 299 method provides the opportunity to link taxonomic information of labeled cells to their  
 300 localization patterns as the oligonucleotide probes used in FISH are designed against  
 301 taxon-specific regions of the rRNA. We applied a standard FISH protocol to label  
 302 microbial cells in Technovit H8100-embedded intestinal sections. Specifically, a  
 303 fluorescently labeled oligonucleotide probe (Eub338-Rhodamine Red X) designed to  
 304 target most bacteria was used to demonstrate the applicability of the FISH protocol after  
 305 either Carnoy or PFA fixation. Our results (Fig 6) showed that fluorescent signals from  
 306 FISH probe-labeled bacterial cells after PFA fixation were comparable to those after  
 307 Carnoy fixation and that the FISH procedure was also compatible with visualization of  
 308 mucus.

309

### 310 **Application of the improved protocol to gnotobiotic mouse gut**

311 To illustrate the utility of the optimized embedment protocol, we applied it to gnotobiotic  
 312 mouse gut colonized by two human gut taxa, one from the phylum Bacteroidetes and  
 313 one from the phylum Firmicutes. Sample xy-plane images are shown in Fig 7. Inspection  
 314 of the images shows clear differentiation of both of the bacterial taxa as well as food  
 315 particles, mucus, and host cells. WGA-stained mucus was clearly visible both in goblet  
 316 cells (Fig 7A) and at the border between mucosa and lumen (Fig 7B). Both of the  
 317 microbial taxa were found in close proximity to one another as well as to mucus (Fig 7B)  
 318 and ingested food particles (Fig 7C,D). The food particles themselves ranged widely in  
 319 size, shape, and autofluorescence spectrum (Fig 7B,C,D) and included both uncolonized  
 320 cavities and cavities colonized by a dense microbial community (Fig 7D). The variety  
 321 and complexity of these features presents both challenges and opportunities for the

analysis of gut microbial spatial distribution. A quantitative analysis of the distribution of microbes relative to these landmarks in the gnotobiotic gut is presented elsewhere (Mark Welch et al., submitted).

## Discussion

A major finding of this study is that special precautions must be taken to preserve the three-dimensional organization of the gut luminal contents including microbes, food particles and mucus. This is not surprising because the luminal contents are not attached to the gut wall and are therefore subject to loss or redistribution. Our results indicate that the protocols involving commonly used embedment media, Tissue-Tek OCT compound, paraffin, or polyester waxes allowed the luminal contents to become redistributed. The reasons for the redistribution seem evident. In the case of the OCT compound, warming of the cryosections permits a loss of immobilization prior to chemical fixation. In the case of paraffin or polyester embedments, their hydrophobicity requires extraction with organic solvents prior to FISH labeling which permits redistribution to occur during and after the extraction step. A cautionary note is that the redistribution was only evident by confocal examination through the depth of the sections. Casual examination of two-dimensional images was not sufficient to reveal the redistribution.

We found that only the hydrophilic, cross-linked methacrylate resin, Technovit H8100 allowed preservation of three-dimensional organization. It was compatible with pre-embedment fixation and post-sectioning labeling. With this embedment, we demonstrated that the micron-scale, three-dimensional spatial arrangement of microbial cells, food particles and mucus could be preserved and visualized in intestinal sections.

347 In addition, we demonstrated that the Technovit H8100 embedment was compatible with  
 348 two different types of mucus labeling methods, immunostaining with anti-MCM antibody  
 349 and staining with WGA and that these mucus stains could be applied to intestinal  
 350 sections that were already labeled with FISH probes. Taken together, these methods  
 351 allow simultaneous visualization of mucus and microbial taxa of interest along with other  
 352 biogeographical landmarks that emit autofluorescence, including host tissues and food  
 353 particles in the same field of view.

354

355 We showed that when intact gut segments are fixed and embedded in methacrylate,  
 356 both Carnoy fixation and PFA fixation are capable of preserving morphological features  
 357 of the sample including microbes, ingested food particles, and mucus. We suggest that  
 358 investigators choose a fixation method based on pilot experiments to determine which  
 359 fixative best preserves epitopes, staining properties, or other features of interest in the  
 360 individual study.

361

362 Finally, we applied the optimized protocol to the gnotobiotic mouse gut colonized by two  
 363 representative human taxa and illustrated how spatial information at the micron scale  
 364 could be observed. Appreciation is growing for the importance of spatial organization to  
 365 understanding microbiome function. The protocol optimized in this study should be  
 366 useful for studies of microbial spatial organization both among members of the microbial  
 367 community as well as in relation to a variety of host biogeographical landmarks. The  
 368 protocol will likely be of value not only for studies of tissue such as gut with non-adherent  
 369 luminal contents, but for other samples as well in which microbe-microbe and host-  
 370 microbe relationships are important.

371

372

## 373 **Acknowledgements**

374 We thank Louie Kerr for microscopy support, Alan Kuzirian and George Bell for advice,  
375 and Braden Tierney and Jake Casper for sectioning and imaging technical assistance.

376 We are deeply grateful to Nathan McNulty and Jeffrey I. Gordon for generously providing  
377 samples from the two-taxon gnotobiotic mice, and to Shanta Messerli for generously  
378 providing samples from conventional mice. This work was supported by the U.S.

379 National Science Foundation grant 1650141 and by NIH National Institute of Dental and  
380 Craniofacial Research grant DE022586.

381

## 382 **References**

383 Amann R, Fuchs BM. Single-cell identification in microbial communities by improved  
384 fluorescence in situ hybridization techniques. *Nat Rev Microbiol.* 2008; 6(5): p. 339-48.

385

386 Amann RI, Binder BJ, Olson RJ, Chisholm SW, Devereux R, Stahl DA. Combination of  
387 16S rRNA-targeted oligonucleotide probes with flow cytometry for analyzing mixed  
388 microbial populations. *Appl Environ Microbiol* 1990; 56(6): pp. 1919-25.

389

390 Cohen M, Varki NM, Jankowski MD, Gagneux P. Using unfixed, frozen tissues to study  
391 natural mucin distribution. *Journal of Visualized Experiments* 2012; 67: e3928. doi:  
392 10.3791/3928.

393

394 DeJonge HW, De Bakker MAG, Verbeek FJ, and Weijs WA. Embedding of large  
395 specimens in glycol methacrylate: prerequisites for multi-signal detection and high-  
396 resolution imaging. *Microscopy Research and Technique* 2005; 66: 25-30.

397

398 Earle KA, Billings G, Sigal M, Lichtman JS, Hansson GC, Elias JE, Amieva MR, Huang  
399 KC, Sonnenburg JL. Quantitative imaging of gut microbiota spatial organization. *Cell*  
400 *Host & Microbe* 2015; 18: 1-11.

401

402 Hansson GC, Johansson ME. The inner of the two Muc2 mucin-dependent mucus  
403 layers in colon is devoid of bacteria. *Gut Microbes* 2010; 1(1): 51-54.

404

405 Heimesaat MM, Bereswill S, Fischer A, Fuchs D, Struck D, Niebergall J, et al. Gram-  
406 negative bacteria aggravate murine small intestinal Th1-type immunopathology following  
407 oral infection with *Toxoplasma gondii*. *Journal of Immunology* 2006; 177: 8785-8795.

408

409 Johansson ME, Phillipson M, Petersson J, Velcich A, Holm L, Hansson GC. *The inner of*  
410 *the two Muc2 mucin-dependent mucus layers in colon is devoid of bacteria*. *Proc Natl*  
411 *Acad Sci U S A* 2008; 105(39): 15064-9.

412

413 Johansson ME, Larsson JM, Hansson GC. The two mucus layers of colon are  
414 organized by the MUC2 mucin, whereas the outer layer is a legislator of host-microbial  
415 interactions. *Proc Natl Acad Sci U S A* 2011; 108 Suppl 1: 4659-65

416

417 Johansson ME, Hansson GC (2012). Preservation of mucus in histological sections,  
418 immunostaining of mucins in fixed tissue, and localization of bacteria with FISH.  
419 *Methods in Molecular Biology* 2012; 842: 229-235.

420

421 Matsuo K, Ota H, Akamatsu T, Sugiyama A, and Katsuyama T. Histochemistry of the  
 422 surface mucous gel layer of the human colon. Gut 1997; 40: 782-789.  
 423

424 Moter A, Leist G, Rudolph R, Schrank K, Choi B-K, Wagner M, Göbel UB. Fluorescence  
 425 *in situ* hybridization shows spatial distribution of as yet uncultured treponemes in  
 426 biopsies from digital dermatitis lesions. Microbiology 1998; 144 (Pt 9): 2459-67.  
 427

428 Moter A, Göbel UB. Fluorescence *in situ* hybridization (FISH) for direct visualization of  
 429 microorganisms. Journal of Microbiological Methods 2000; 41: 85-112.  
 430

431 Rhodes JM. Colonic mucus and mucosal glycoproteins: the key to colitis and cancer?  
 432 Gut 1989; 30: 1660-1666.  
 433

434 Schimak MP, Kleiner M, Wetzel S, Liebeke M, Dubilier N, Fuchs BM. MiL-FISH:  
 435 Multilabeled oligonucleotides for fluorescence *in situ* hybridization improve visualization  
 436 of bacterial cells. Applied and Environmental Microbiology 2016; 82(1): 62-70.  
 437

438 Swidsinski A, Weber J, Loening-Baucke V, Hale LP, Lochs H. Spatial organization and  
 439 composition of the mucosal flora in patients with inflammatory bowel disease. Journal of  
 440 Clinical Microbiology 2005; 43(7): 3380-3389.  
 441

442 Zijlstra V, van Leeuwen MBM, Degener JE, Abbas F, Thurnheer T, Gmür R, Harmsen  
 443 HJM. Oral biofilm architecture on natural teeth. PLoS One 2010; 5(2): e9321.

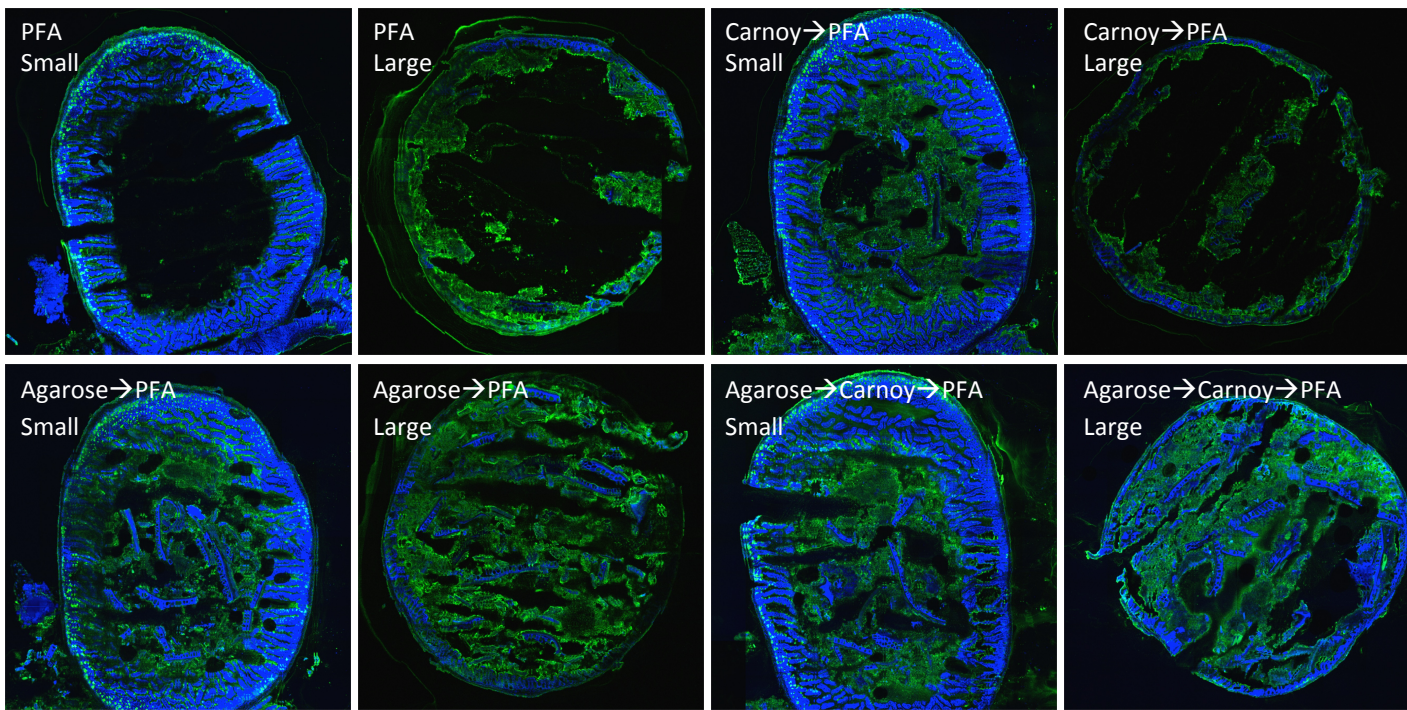

**Figure 1. Agarose coating reduces loss of material from cryosections.** Cryosections of small or large intestine were fixed with PFA with or without prior immersion in Carnoy solution (top row). For comparison, cryosections were coated with 1% low-melting point agarose and then subjected to the same fixation procedures. All samples were then stained with DAPI (blue) and Alexa fluor 488-labeled wheat germ agglutinin (green). For this test, dual-taxa colonized large and small intestinal samples were used.



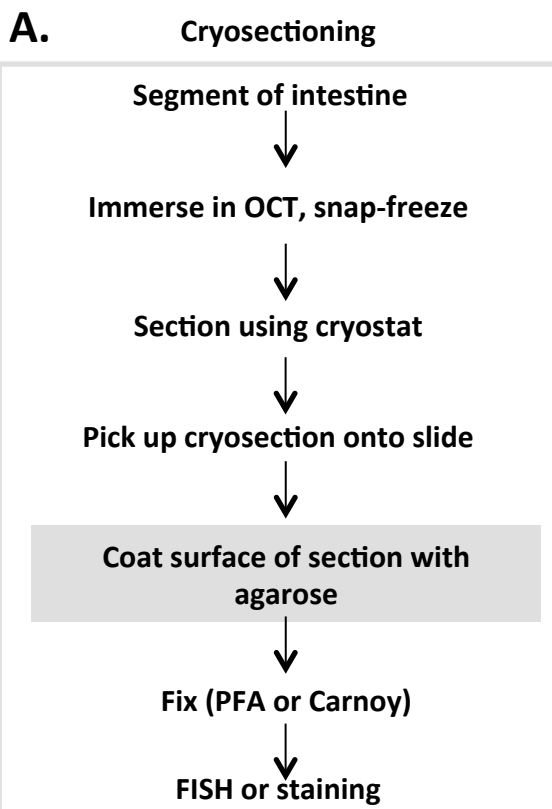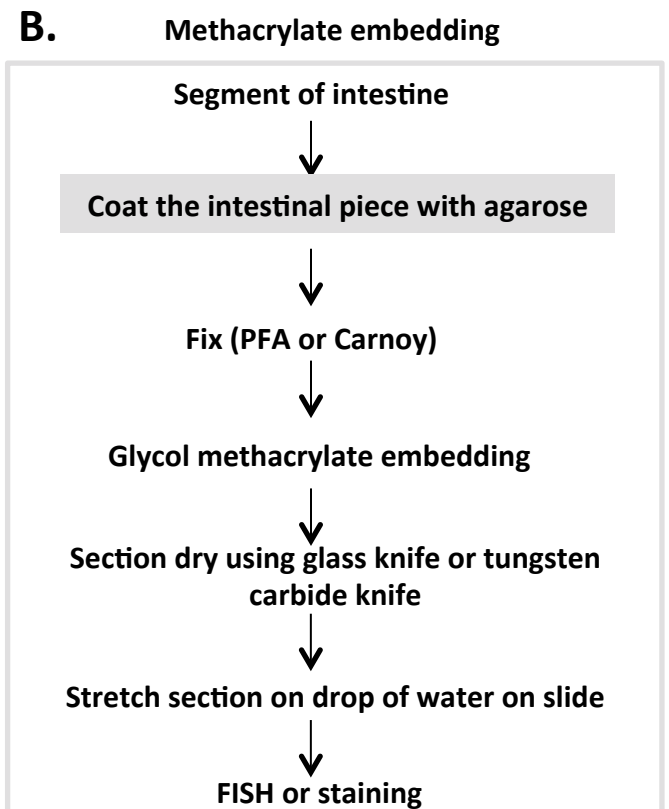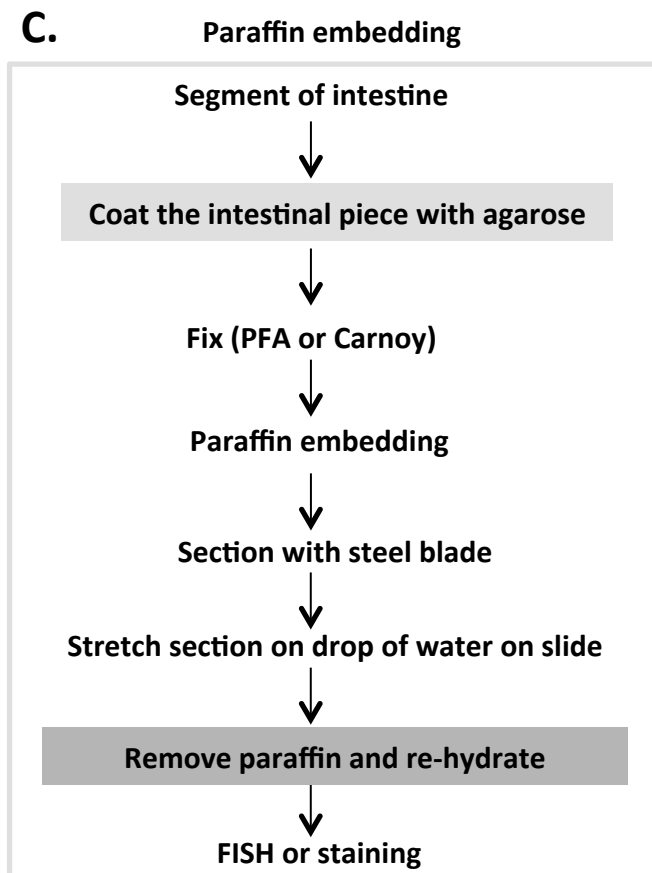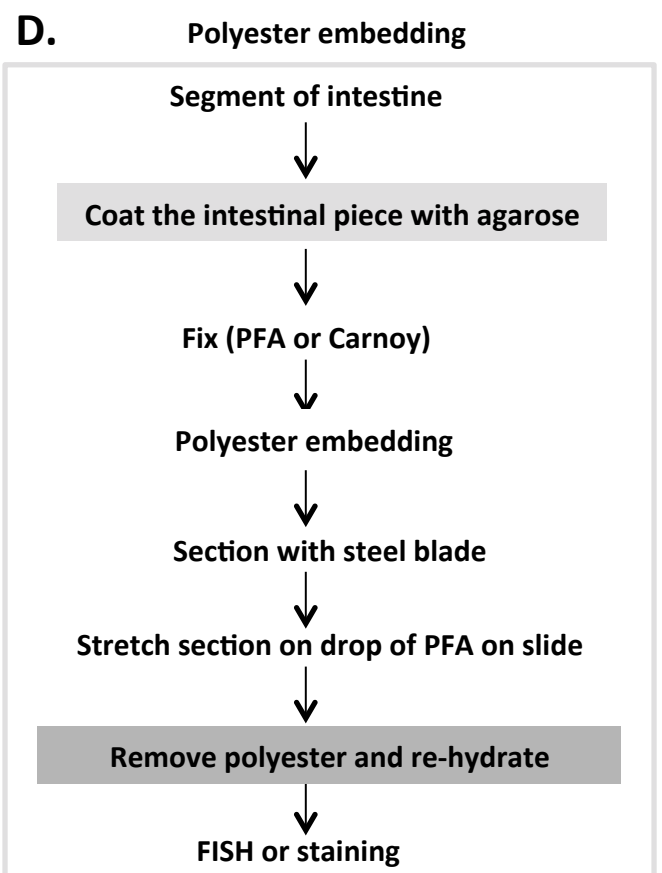

**Figure 2. Intestinal embedding and section preparation protocols.**



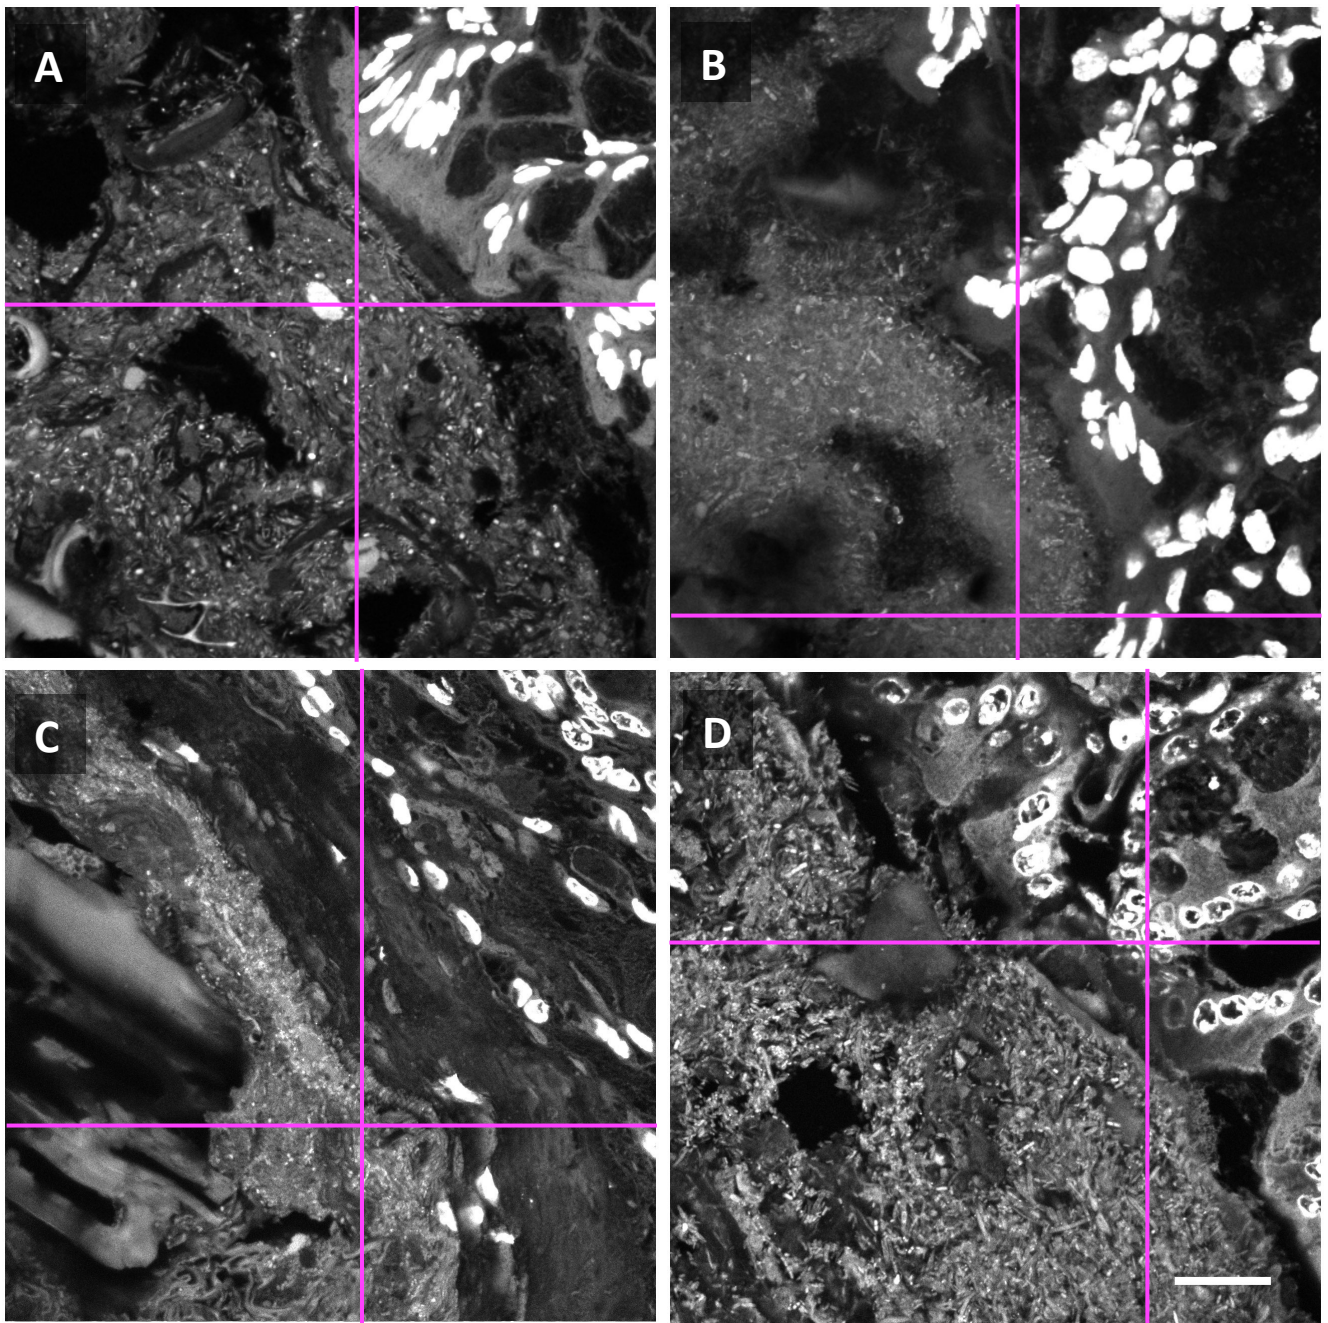

**Figure 3. Multiple preparation methods permit imaging of the gut microbial community.** Mouse proximal colon embedded in methacrylate resin (A), cryosectioned (B), or processed by embedding and sectioning in paraffin (C) or polyester wax (D). Sections were stained with DAPI and washed, and images were acquired with a confocal microscope using 405 nm excitation. Mucosal tissue (upper right in each panel) shows bright DAPI staining in cell nuclei. Luminal contents including microbes and ingested food particles are at lower left in each image. Magenta lines indicate positions of projections shown in Figure 4. Scale bar = 20 microns.

methacrylate

cryosection

paraffin

polyester

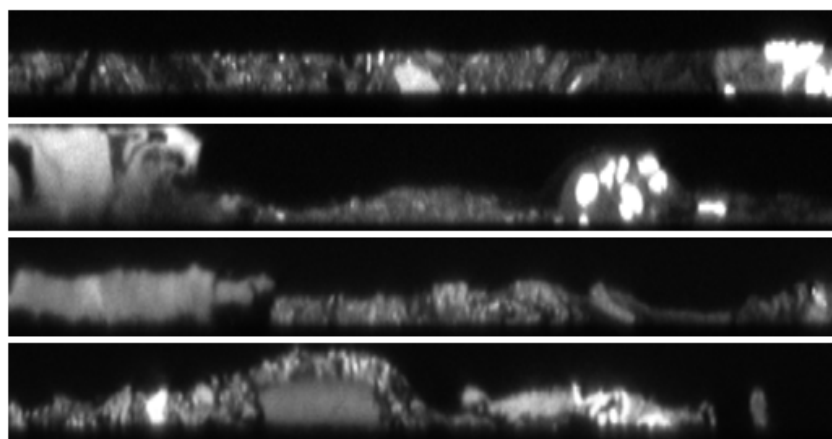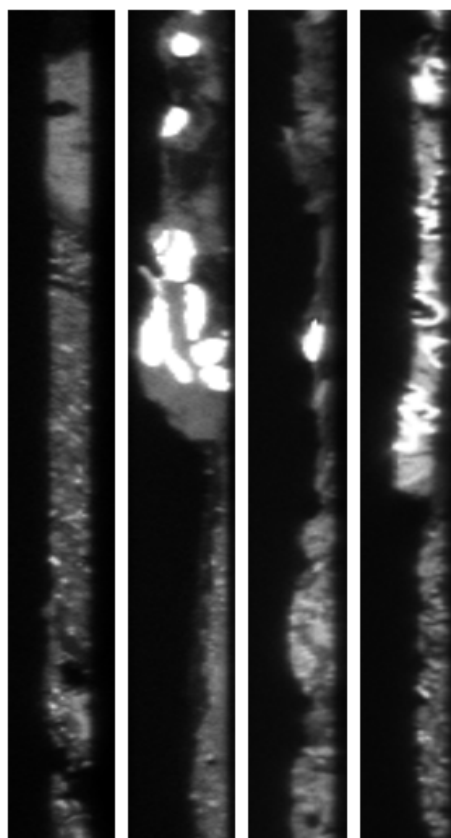

meth cryo par poly

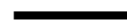

**Figure 4. Three-dimensional structure of the gut microbial community is preserved by embedding in methacrylate resin.** Projections along the  $xz$ - and  $yz$ -planes show that the methacrylate-embedded section is of consistent thickness throughout, whereas the microbial community collapses onto the slide or is partially washed away when using cryosectioning, paraffin, and polyester embedding. From a stack of 35 images at half-micron intervals forming a  $z$ -series for each section, the projections of the stack along the  $xz$ -plane (top) and  $yz$ -plane (bottom) are shown. The positions of the  $xz$ - and  $yz$ -images in the  $xy$ -plane are shown by the magenta lines in Figure 3. Scale bar = 20 microns.

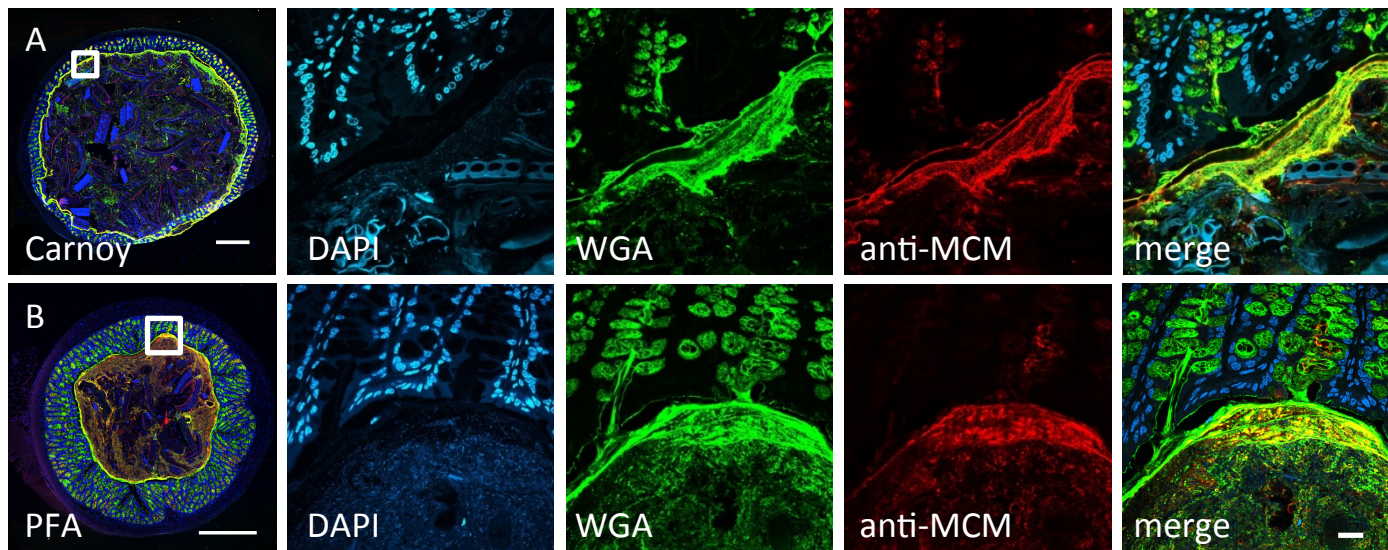

**Figure 5. Carnoy and PFA fixation are both capable of preserving mucus, host tissue, and ingested food in intestinal segments that are embedded in methacrylate and sectioned.** Overview images (at left) show entire cross-sections of mouse proximal colon fixed with Carnoy (A) or paraformaldehyde (B). Middle panels show higher-magnification images stained with DAPI (blue), wheat germ agglutinin (green) and an antibody against mouse colonic mucin (anti-MCM, red) with a merged overlay image shown at right. Mucus, stained by both wheat germ agglutinin and anti-MCM, is preserved with both fixation methods. Scale bar = 500 microns in overview images, 20 microns in other panels.



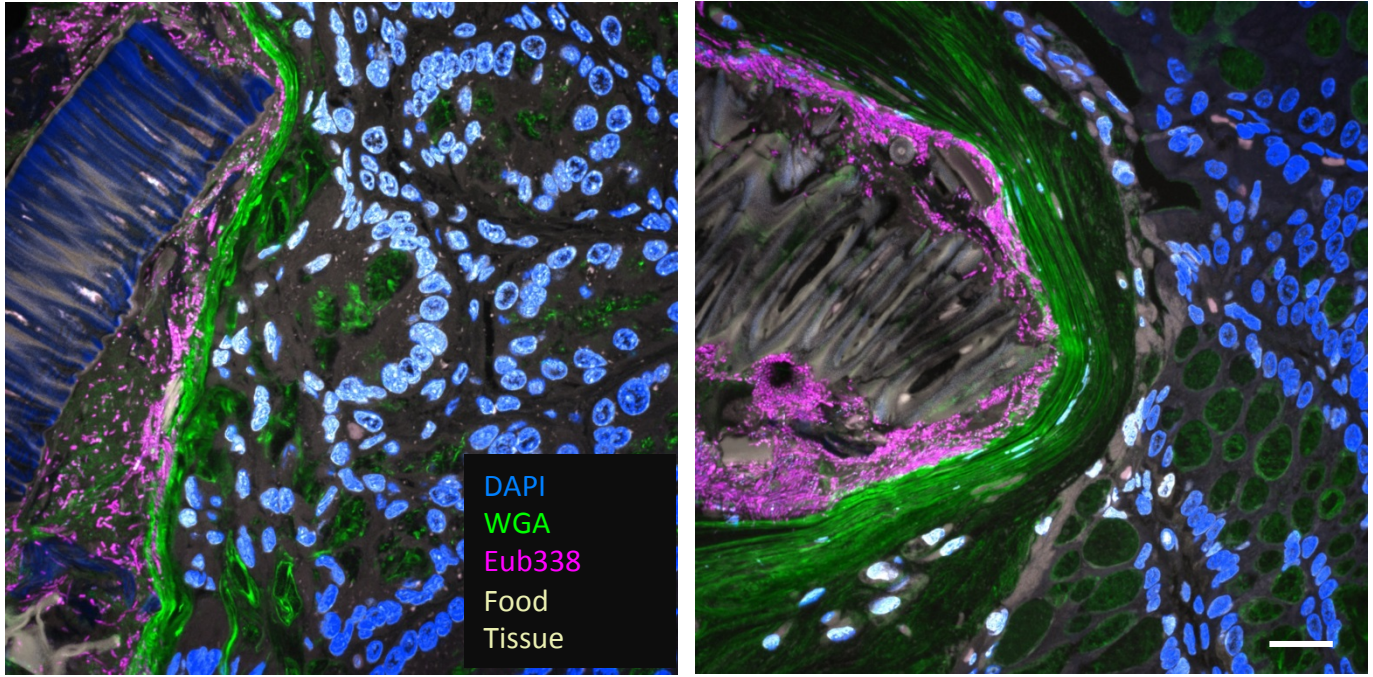

**Figure 6. Simultaneous visualization of mucus, FISH-reactive microbes, host tissue, and ingested food with Carnoy fixation and with PFA fixation.** Adjacent 1 cm segments of intestine were fixed in Carnoy or PFA, embedded in methacrylate, sectioned, probed in parallel and imaged with identical imaging settings. Left: Carnoy; right: PFA. Maximum intensity projection of 4 to 5 planes. DAPI stains nucleic acids, wheat germ agglutinin (WGA) stains mucus, and the Eub338 probe hybridizes with most bacteria. Scale bar = 20 microns.



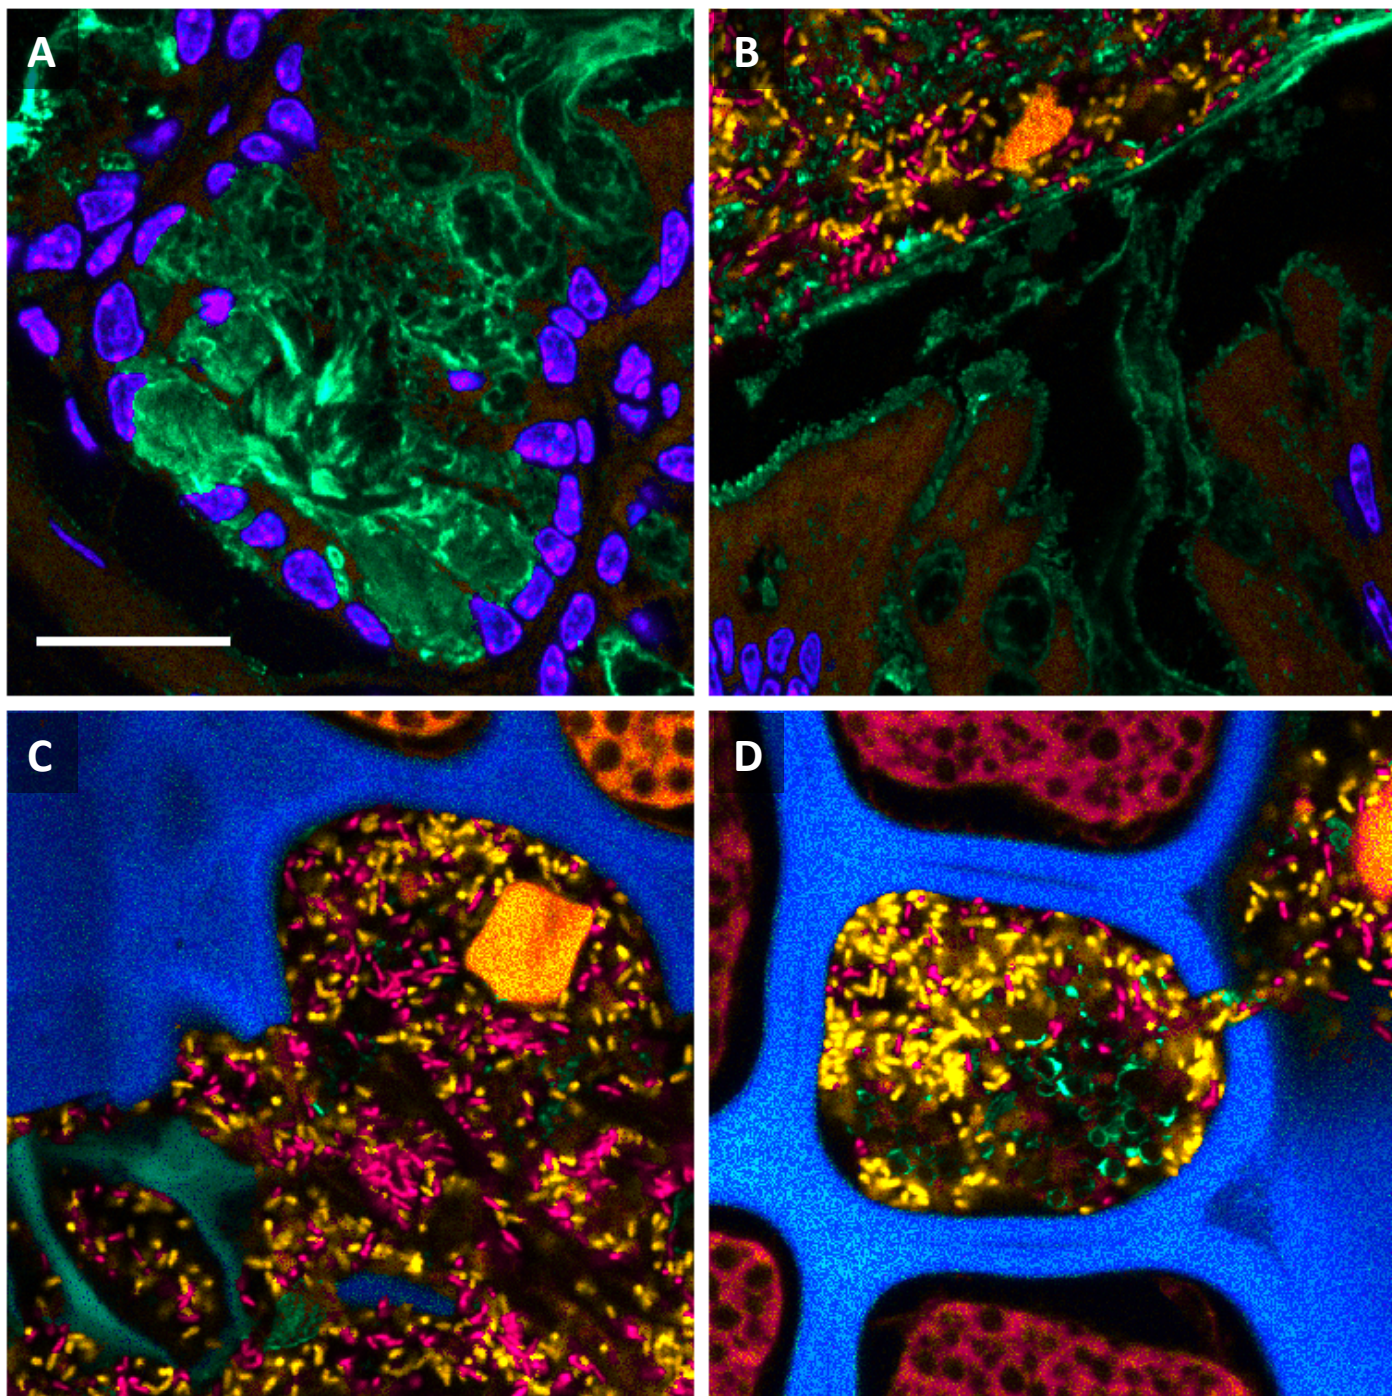

**Figure 7. Visualization of the spatial organization of the gut environment using PFA fixation and methacrylate embedment.** A gnotobiotic mouse colonized with *B. theta* and *E. rectale* was fixed with paraformaldehyde, embedded in methacrylate, sectioned, hybridized with oligonucleotide probes to differentiate the two microbial taxa, and stained with DAPI and with fluorophore-labeled wheat germ agglutinin. Fluorescence spectral images were coded to approximate true color. (A): host cell nuclei (blue) and mucus in goblet cells (green). (B): the border between mucosa and lumen. Host cell nuclei are blue, mucus is green, *B. theta* is orange and *E. rectale* is red. Host tissue and a ten-micron-long food particle fluoresce orange. (C): a region of the lumen showing food particles with varying shapes and autofluorescence spectra in blue, green, and orange, signifying different types of food particles. (D): one such food particle possessed both colonized and uncolonized cavities. Scale bar = 20 microns.
